# Supplementary material for: Complement receptor 1 (CR1, CD35) association with susceptibility to leprosy
Source: PubMed Central journal article supplement (PMC6103516; doi:10.1371/journal.pntd.0006705), 2018-08-09
Supplement: pntd.0006705.s002.pdf [file pntd.0006705.s002.pdf]

## ELETRONIC SUPPLEMENTARY MATERIAL

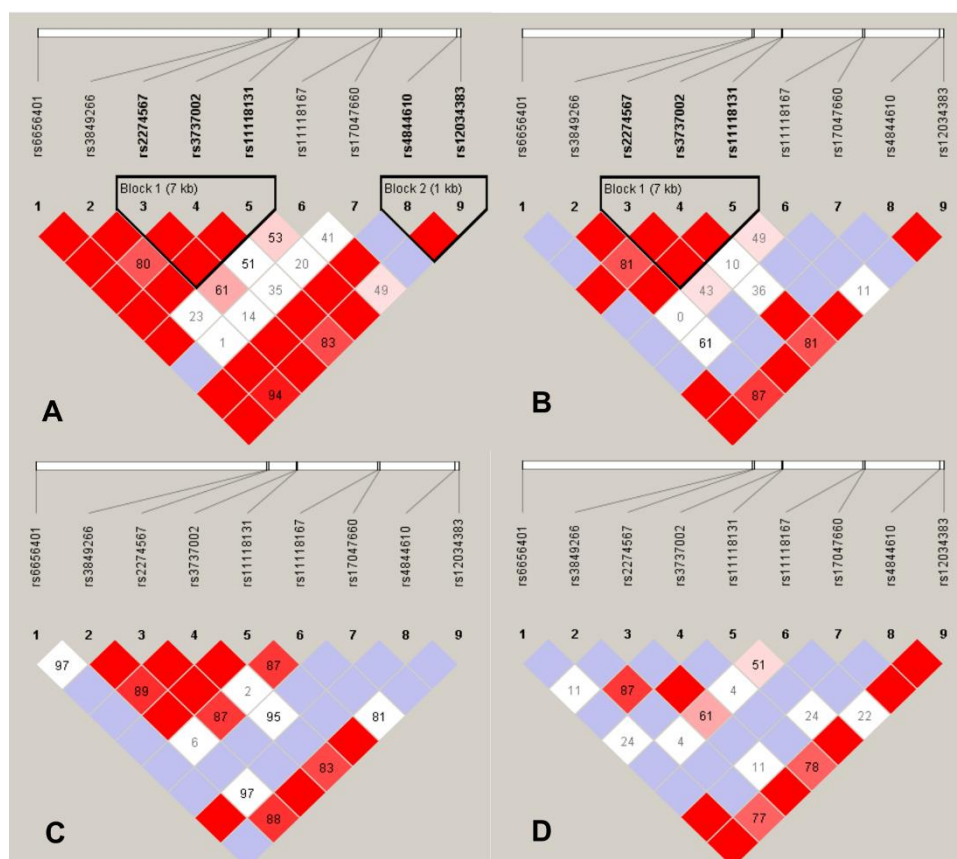

**S2 Figure.** Linkage disequilibrium between the investigated CR1 polymorphisms.

Colors are indicative of  $D'$ /logarithm of odds (LOD), and values correspond to  $r^2$ . Bright red color represents LOD score for  $LD \geq 2$  and  $D = 1$ , shades of pink/red represents  $LD \geq 2$  and  $D < 1$ , blue color represents  $D = 1$  but  $LD < 2$ , and white squares represent  $LD < 2$  and  $D < 1$ . A) Euro-Brazilians controls; B) Euro-Brazilians patients; C) Afro-Brazilian controls; D) Afro-Brazilian patients. Plots were constructed using Haploview 4.2.
