# Supplementary material for: Complement receptor 1 (CR1, CD35) association with susceptibility to leprosy
Source: PubMed Central journal article supplement (PMC6103516; doi:10.1371/journal.pntd.0006705), 2018-08-09
Supplement: pntd.0006705.s003.pdf [file pntd.0006705.s003.pdf]

**S1 Table.** *CR1* gene expression in leprosy.

|                | <b>PAT</b> | <b>CON</b> | <b>p</b> | <b>MB</b> | <b>PB</b> | <b>p</b> | <b>G<sup>+</sup></b> | <b>AA</b> | <b>p</b>     |
|----------------|------------|------------|----------|-----------|-----------|----------|----------------------|-----------|--------------|
| <b>N</b>       | 45         | 31         |          | 7         | 37        |          | 33                   | 9         |              |
| <b>Median</b>  | 2.10       | 1.63       | 0.813    | 1.41      | 2.20      | 0.245    | 2.39                 | 1.25      | <b>0.043</b> |
| <b>Min-Max</b> | 0.39-7.28  | 0.31-6.19  |          | 0.51-3.58 | 0.39-7.28 |          | 0.39-7.28            | 0.53-2.80 |              |

Pat.: Patient; Con.: control; MB: multibacillary; PB: paucibacillary; N: samples; min.: minimum; med.: median; max.: maximum; P: P value for non parametric Mann-Whitney test; G + and AA correspond to SNP rs12034383. In bold: significant.
