# Supplementary material for: Complement receptor 1 (CR1, CD35) association with susceptibility to leprosy
Source: PubMed Central journal article supplement (PMC6103516; doi:10.1371/journal.pntd.0006705), 2018-08-09
Supplement: pntd.0006705.s004.pdf [file pntd.0006705.s004.pdf]

## ELETTRONIC SUPPLEMENTARY MATERIAL

**S2 Table.** Concentration of soluble CR1 in leprosy.

|                 | PAT       | CON       | p     | MB        | PB        | p     | rs12034383     |           | p            | rs3849266           |           | p            | rs3737002           |           | p            |
|-----------------|-----------|-----------|-------|-----------|-----------|-------|----------------|-----------|--------------|---------------------|-----------|--------------|---------------------|-----------|--------------|
|                 |           |           |       |           |           |       | A <sup>+</sup> | GG        |              | T <sup>+</sup> (PB) | CC(PB)    |              | T <sup>+</sup> (PB) | CC(PB)    |              |
| <b>N</b>        | 58        | 22        |       | 30        | 28        |       | 21             | 13        |              | 13                  | 15        |              | 16                  | 12        |              |
| <b>Median.</b>  | 0.47      | 0.45      | 0.515 | 0.47      | 0.50      | 0.324 | 0.58           | 0.42      | <b>0.023</b> | 0.45                | 0.82      | <b>0.040</b> | 0.45                | 0.87      | <b>0.046</b> |
| <b>Min-Max.</b> | 0.07-3.82 | 0.09-0.98 |       | 0.07-3.82 | 0.08-2.85 |       | 0.33-3.82      | 0.07-0.92 |              | 0.08-0.96           | 0.09-2.85 |              | 0.08-0.98           | 0.09-2.85 |              |

Pat.: Patient; Con.: control; MB: multibacillary; PB: paucibacillary; N: samples; min.: minimum; med.:median; max.: maximum; P: P value for non parametric Mann-Whitney test; In bold: significant.
